# Supplementary material for: Photocurable Bioink for the Inkjet 3D Pharming of Hydrophilic Drugs
Source: MDPI journal article supplement (doi:10.3390/bioengineering4010011), 2017-01-28
Supplement: s1 [file s1]

# Supplementary Materials: Photocurable Bioink for the Inkjet 3D Pharming of Hydrophilic Drugs

Giovanny F. Acosta-Vélez, Chase S. Linsley, Madison C. Craig and Benjamin M. Wu

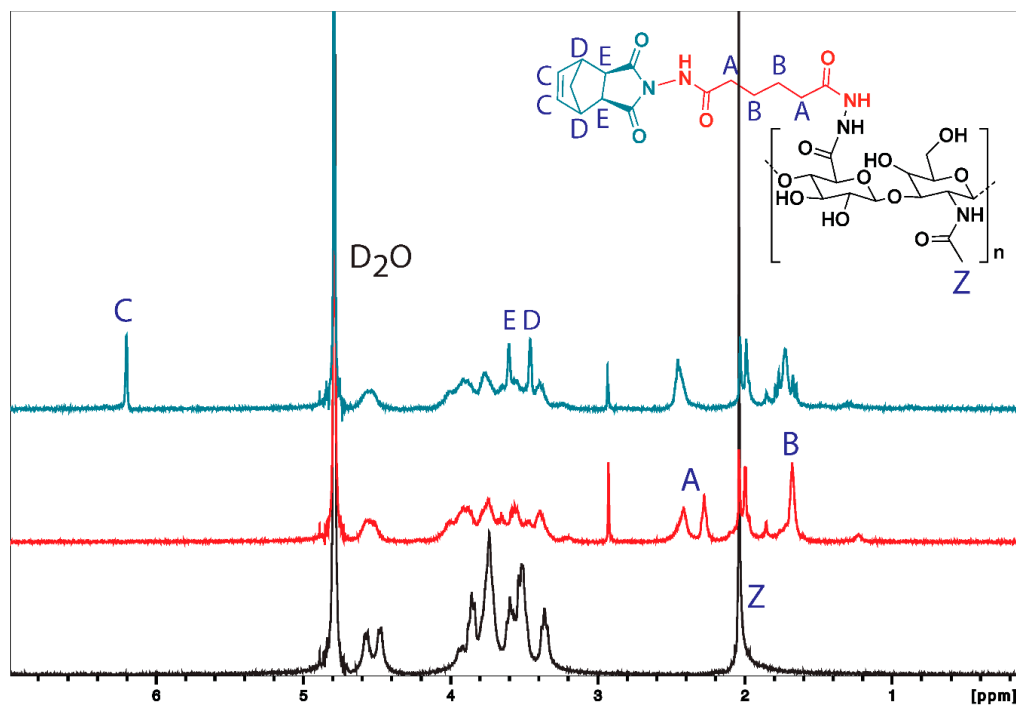

**Figure S1.**  $^1\text{H}$  NMR shifts of norbornene groups ( $\text{D}_2\text{O}$ ): Z (methyl protons in hyaluronic acid, 3H); A ( $\alpha$  protons in the ADH group, 4H); B ( $\beta$  protons in the ADH group, 4H); C (*endo* vinyl protons, 2H); D (bridgehead protons, 2H); E (norbornene  $\alpha$  protons, 2H).

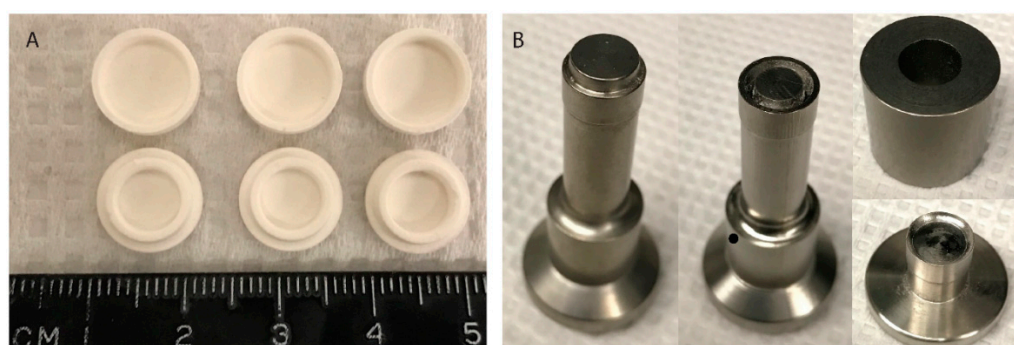

**Figure S2.** Custom preform tablet punches and die for direct powder compression.

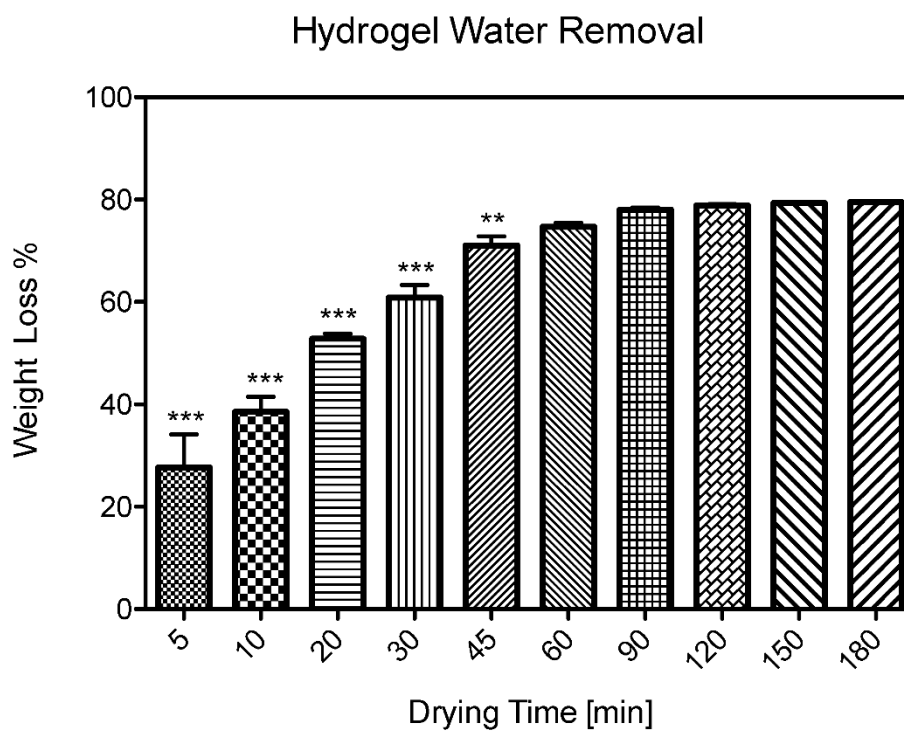

**Figure S3.** Statistics on tablet water removal percentage over drying time. A One-way ANOVA test with a Dunnett's post-test analysis was done, with column (180 min) taken as control. Asterisks denote statistical significance (\*\* denotes  $p < 0.01$ ; \*\*\* denotes  $p < 0.001$ ). Results show no statistical difference after 60 min of drying at 50 °C.
